# Supplementary material
Source: Springer Nature journal article supplement (https://www.springermedizin.de/resource/supplementary/12889_2011_3562_MOESM5_ESM.pdf/9489332)
Supplement: MOESM5 [file 9489332]

# Potential integration strategies within and across care domains

Care domain

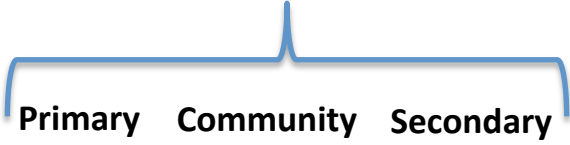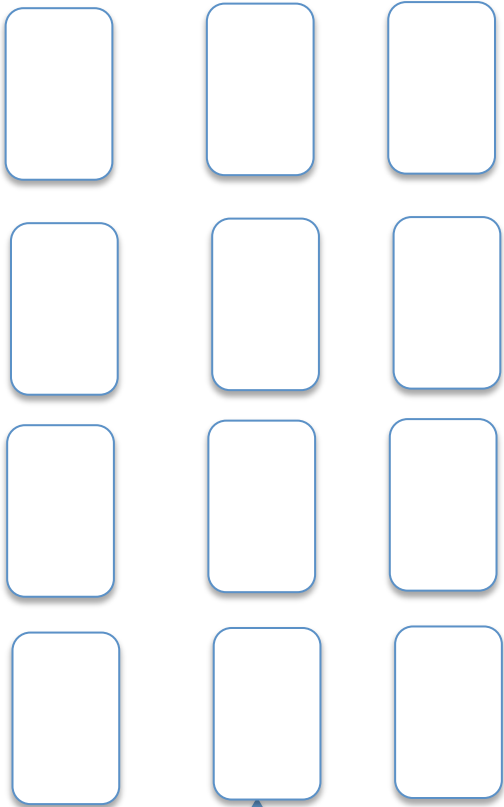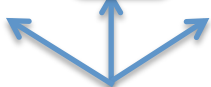

Services or programs

**a. Unintegrated**

Primary Community Secondary

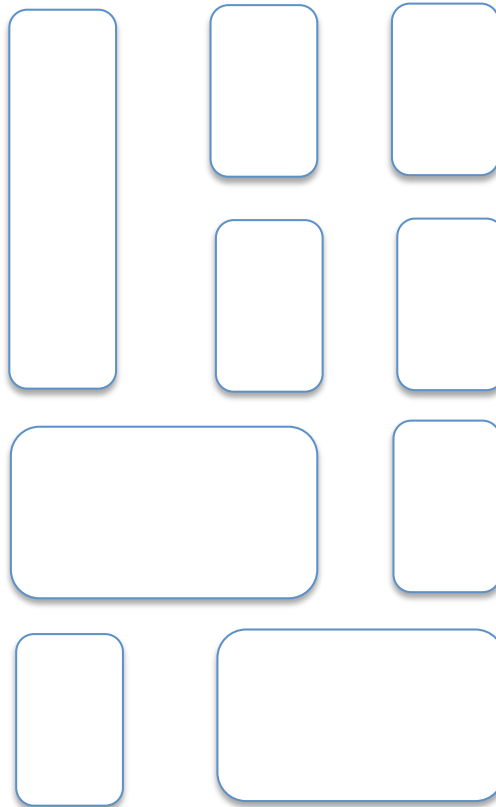

Primary Community Secondary

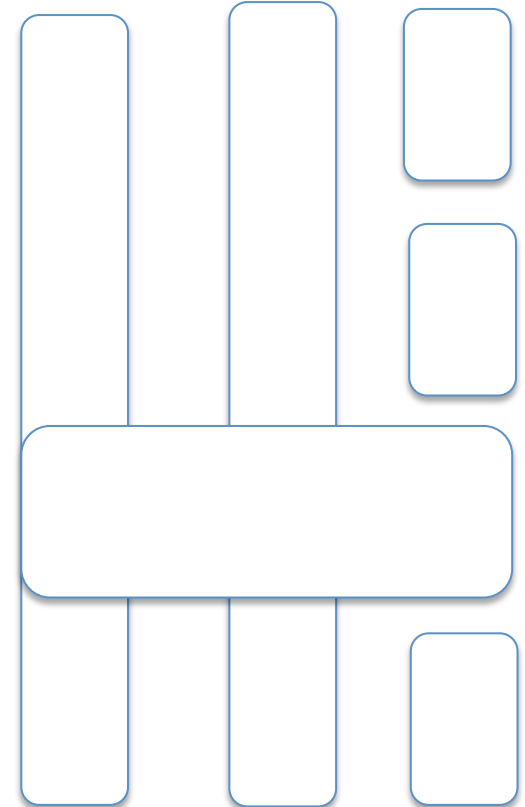

**c. Horizontally or vertically integrated**
